# Supplementary material
Source: PubMed Central journal article supplement (PMC3278917)

Supplemental Fig. S1:  
Short Tandem Repeat (STR) Analysis

| locus                                                                                 | Xenografts:<br>736, 777, 9216R, 9218R, 8R, and 8L |                      | 22Rv1   |                         | CWR-R1                  |                      |
|---------------------------------------------------------------------------------------|---------------------------------------------------|----------------------|---------|-------------------------|-------------------------|----------------------|
|                                                                                       | alleles                                           | frequency, 1 in ____ | alleles | frequency, 1 in ____    | alleles                 | frequency, 1 in ____ |
| D5S818*                                                                               | 11, 12                                            | 3.91                 | 11, 13  | 9.50                    | 11, 12                  | 3.91                 |
| D7S820†                                                                               | 9,10,11                                           | 11.60                | 9,10,11 | 11.60                   | 9,10,12                 | 11.60                |
| D13S317                                                                               | 8, 12                                             | 15.94                | 9, 12   | 26.39                   | 8, 12                   | 15.94                |
| D16S539                                                                               | 12, 12                                            | 9.77                 | 12, 12  | 9.77                    | 12, 12                  | 9.77                 |
| TH01                                                                                  | 6, 9.3                                            | 7.39                 | 6, 9.3  | 7.39                    | 6, 9.3                  | 7.39                 |
| TPOX                                                                                  | 8, 8                                              | 4.11                 | 8, 8    | 4.11                    | 8, 8                    | 4.11                 |
| CSF1PO                                                                                | 10, 11                                            | 5.86                 | 10, 11  | 5.86                    | 10, 11                  | 5.86                 |
| Random Match                                                                          |                                                   |                      |         |                         |                         |                      |
| Probability, 1 in ____ :                                                              |                                                   | 1,259,877            |         | 5,062,112               |                         | 1,259,877            |
| Random chance that the xenografts and 22Rv1 or R1 would have the same allele pattern: |                                                   |                      |         |                         |                         |                      |
|                                                                                       |                                                   |                      |         | 1.6 X 10 <sup>-13</sup> | 6.3 X 10 <sup>-13</sup> |                      |

\*STR analysis at locus D5S818 was not determined for sample 736.

† Frequency for D7S820 was determined using only the 9 and 10 allele frequencies.

## Supplemental Fig. S2: Primers used for PCR

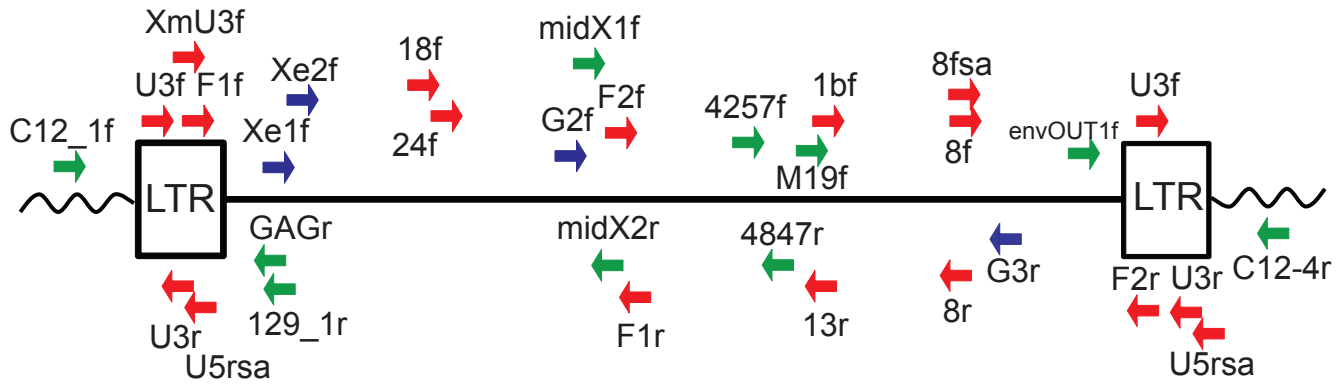

| Primer:  | Sequence                                                                              | 5' nucleotide position# | 1  | 2  | X |
|----------|---------------------------------------------------------------------------------------|-------------------------|----|----|---|
| U3f      | 5' -GTTTAATTAAAGAATAAGGCTGAATAAC-3'                                                   | 7826                    | +  | -  | + |
| 13r      | 5' -ATGTCTTCTAACAGCTTTTTGGACACG-3'                                                    | 5108                    | +  | -  | + |
| 18f      | 5' -GGCAGAGGATGAGCAGAGAGAGAG-3'                                                       | 1974                    | -! | +  | + |
| 24f      | 5' -AAGAAAAGGGACACTGGGCTAAGG-3'                                                       | 2129                    | +  | +  | + |
| 1bf      | 5' -AGGCATTCCCGACCAAGCG-3'                                                            | 5048                    | +  | -  | + |
| 8r       | 5' -CTGGATGCTACCGGAGCCCC-3'                                                           | 6284                    | +  | -  | + |
| 8f       | 5' -GGGCTCCGGTAGCATCCAG-3'                                                            | 6266                    | +  | -  | + |
| U3r      | 5' -CCCCTTTTTTATAGGGCTAGGAC-3'                                                        | 8096                    | -! | -  | + |
| 8fsa     | 5' -CCTGTTTTGATTCCCTCAGTGGG-3'                                                        | 6247                    | +  | -  | + |
| U5rsa    | 5' -TCTGAGGAGACCCTCCCAAGG-3'                                                          | 112                     | +  | +  | + |
| F1f      | 5' -GCGCCAGTCATCCGATAGACTGAGTCGCCCGGGTAC<br>CCGTGTTCCCAATAAAGCC-3'                    | 1                       | -  | +  | + |
| F1r      | 5' -GCCGACGCCAAGGTCCCAGTTTTTGC GTTAGGACGC<br>CTTTGGCGTAGCCCTGCTTCTCGTCGACAAAGAGTTC-3' | 3754                    | -  | +  | + |
| F2f      | 5' -GAACTCTTTGTGCGACGAGAAGCAGGGCTACGCCAAA<br>GGCGTCTAACGCAAAAAGTGGGACCTTGGCGTCGGC-3'  | 3682                    | -  | +  | + |
| F2r      | 5' -TTGCAAACAGCAAAAAGGCTTTATTGGGAACACGGGT<br>ACCCGGGCGACTCAGTCTATCGGATGACTGGC-3'      | 8185                    | +  | -  | + |
| XmU3f    | 5' -GTCCTAGCCCTATAAAAAAGGGG-3'                                                        | 8074                    | -  | -  | + |
| G2f      | 5' -CCCTTATACCCGCTCACCAAGAC-3'                                                        | 3550                    | +  | -  | - |
| G3r      | 5' -TGGAGCTGCTCAAATTGTTGGG-3'                                                         | 7204                    | +  | -  | - |
| Xe1f     | 5' -GTGGCCAATCAGTAAGTCCGAG-3'                                                         | 410                     | +  | -  | - |
| Xe2f     | 5' -CACTCCCTTGAGTCTGACCCTTG-3'                                                        | 630                     | +  | -  | - |
| GAGr     | 5' -TCCCCAACAAAGCCACTCCA-3'                                                           | 473                     | -  | +  | + |
| midX1f   | 5' -TTGTCGACGAGAAGCAGGGC-3'                                                           | 3689                    | -  | +  | + |
| midX2r   | 5' -TGCGTTAGGACGCCTTTGGC-3'                                                           | 3731                    | -  | +  | + |
| envOUT1f | 5' -CTGACCCAACAGTATCACCAACTC-3'                                                       | 7629                    | +  | +  | + |
| C12_1f   | 5' -TGCTGGACAGAATCTCTGGTCTCT-3'                                                       | Ch12                    | -  | -  | - |
| C12_4r   | 5' -GATACTCAAGTGGTTCCCACCC-3'                                                         | Ch12                    | -  | -  | - |
| 129_1r   | 5' -GCGGTTTCGGCGTAAAACCGAAAGCA-3'                                                     | 537                     | -  | +  | + |
| 4847r    | 5' -CTTTGCTGGCATTACTTGGGCA-3'                                                         | 4909                    | +  | -! | + |
| 4257f    | 5' -GATGGCAGAAGGTAAGAAGCTAAATGTTTA-3'                                                 | 4296                    | +  | -! | + |
| M19f     | 5' -TGGCCTTACTGAAAGCTCTCTTCC-3'                                                       | 4436                    | -  | +  | - |

#: 5' nucleotide position relative to XMRV-22Rv1 (Acc. FN692043).

-!: primer has mismatches with the proviral genome, but was able to amplify the proviral sequence.

# SUPPLEMENTAL FIG. S3: Location and Numbers of Cloned PCR Products Used for Sequencing Analysis

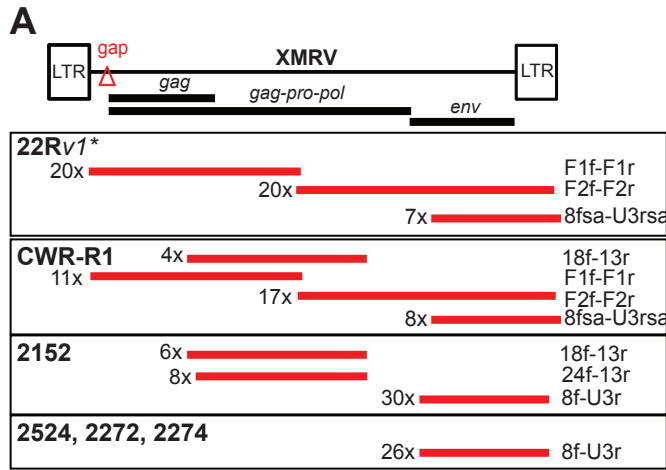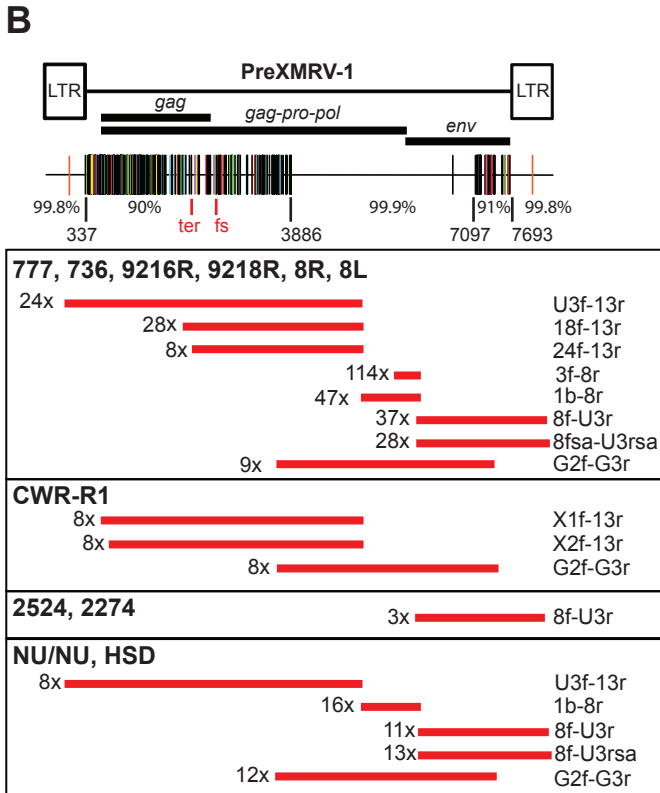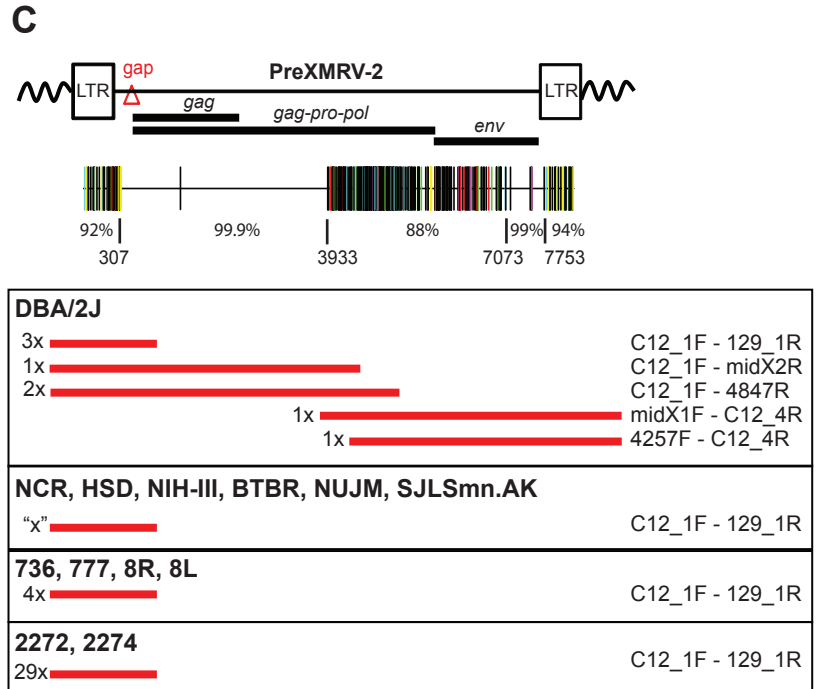

## Supplemental Figure S4A: Phylogenetic analysis of full-length genomes

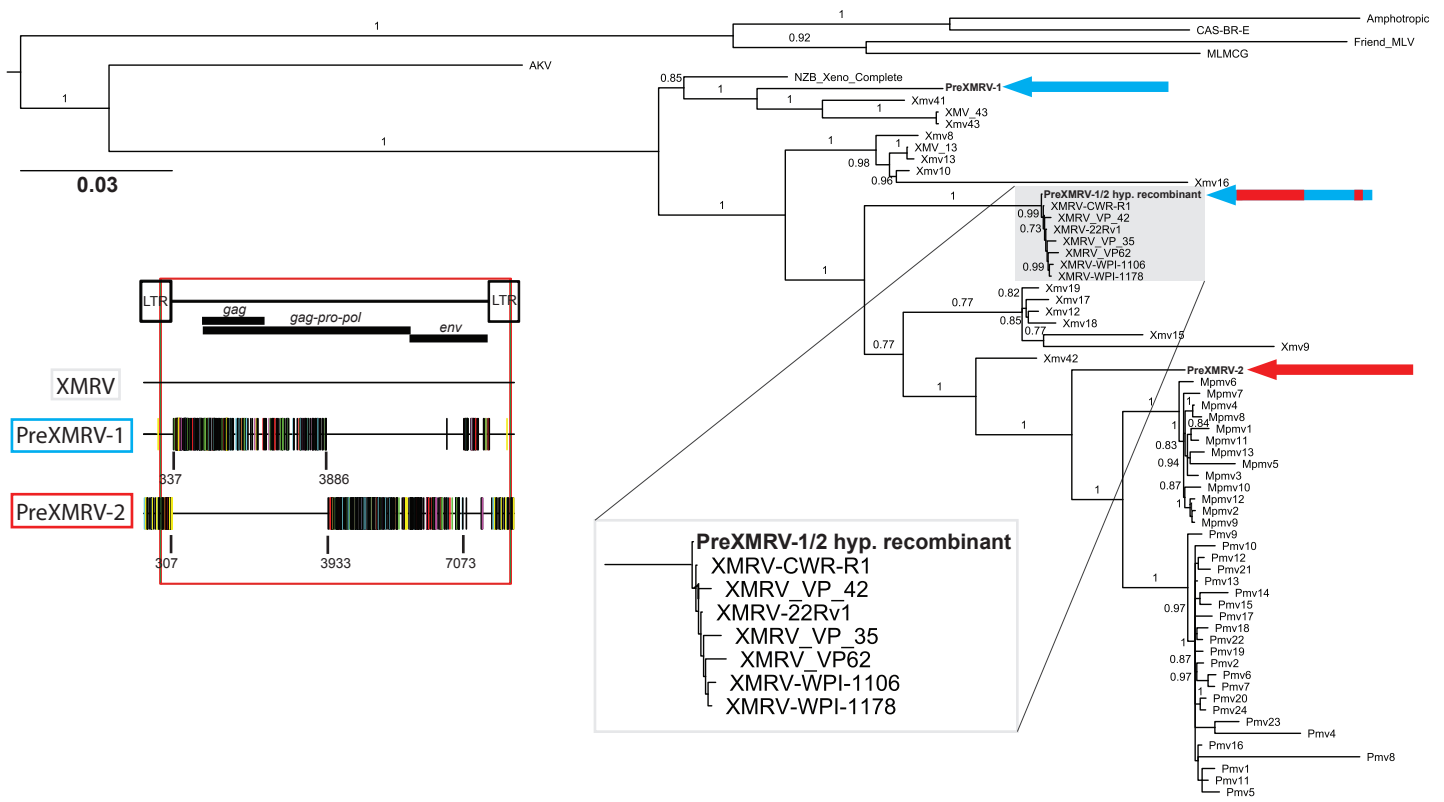

## Supplemental Figure S4B: Phylogenetic analysis of XMRV and PreXMRV-1 homology

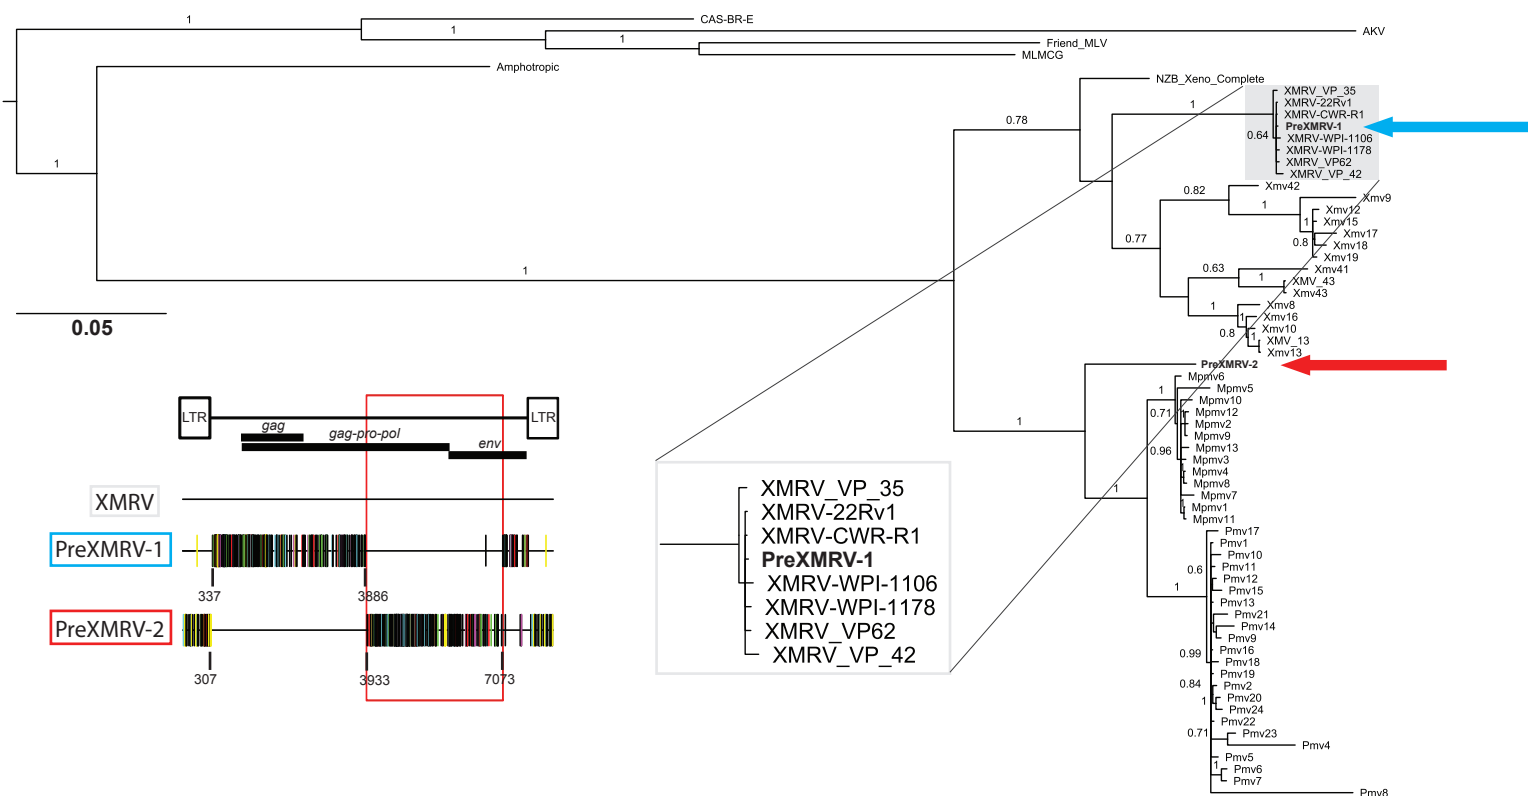

# Supplemental Figure 4C: Phylogenetic analysis of XMRV and PreXMRV-2 homology

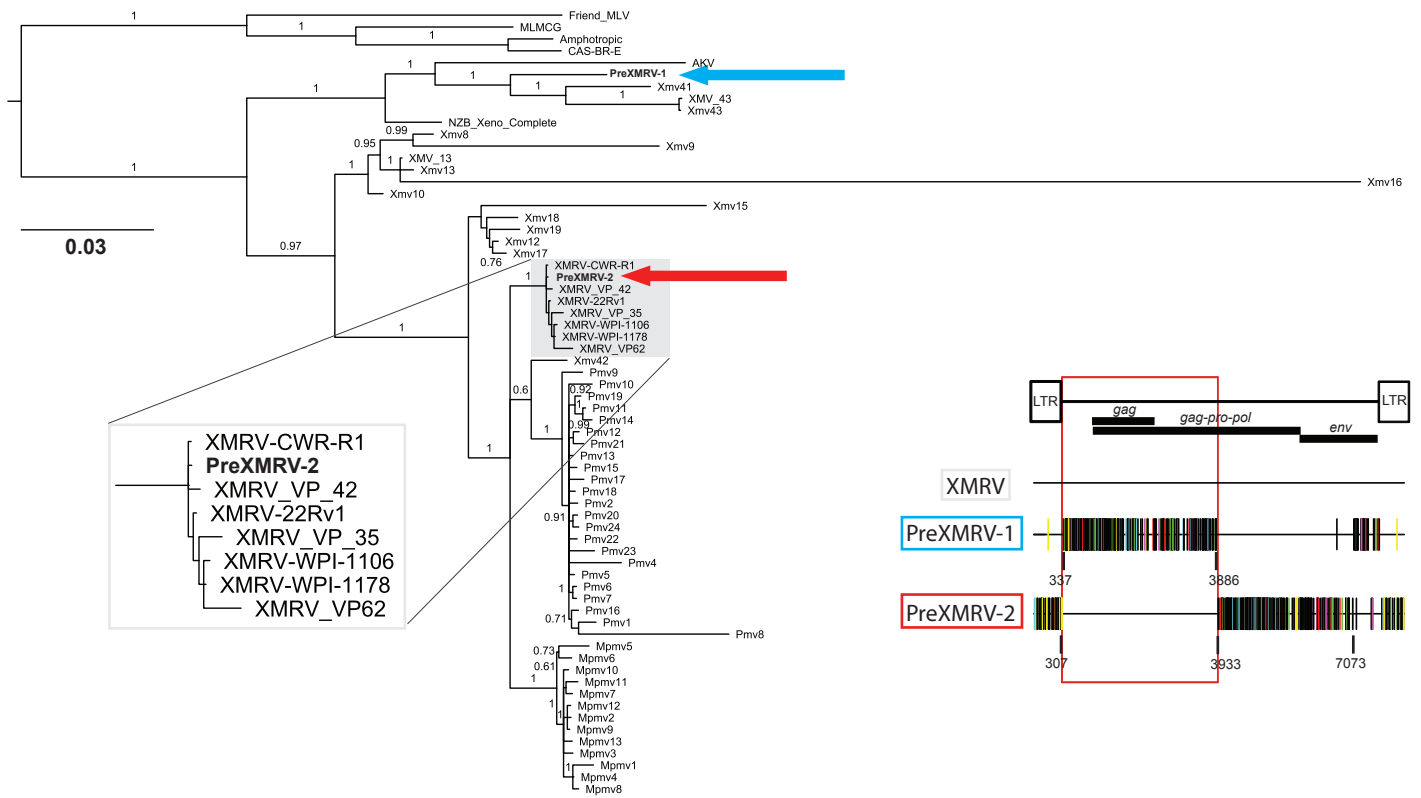

# Supplemental Figure 4D: Phylogenetic analysis of the U3-R region

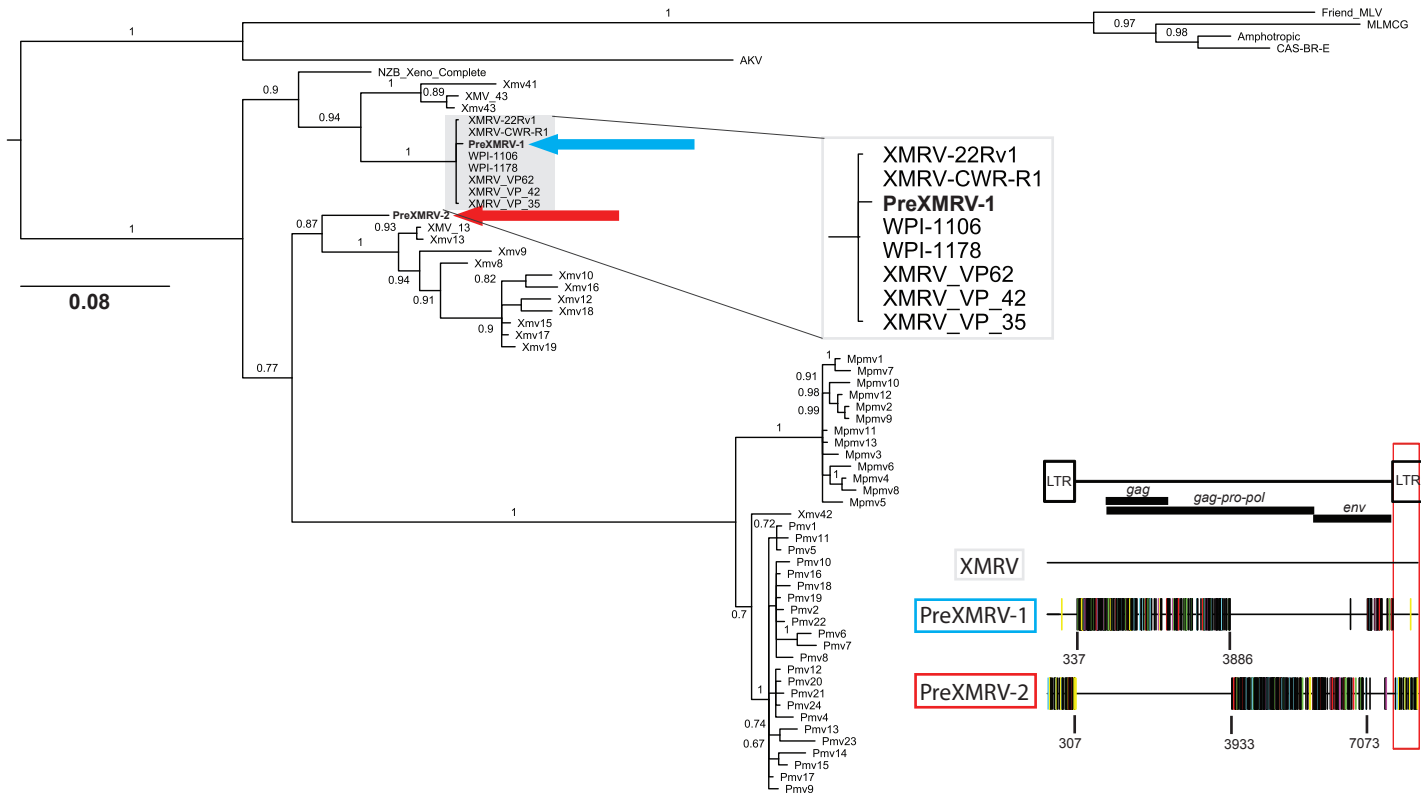

# Supplemental Fig. S5: Predicted Regions of RT Template Switching Events and XMRV Sequence Diversity

**A**

## Predicted Regions of RT Template Switching Events

7693  
 1 TAAAT GATTTTATTCAGTTTCC.....CCATAAGGCTTAGCA CGCTA  
 TAAA GATTTTATTCAGTTTCC.....CCATAAGGCTTAGCA AGCTA  
 7753

7557  
 2 GATAG TACTTTTATTAATCCTACTC CTCGG  
 GATAA TACTTTTATTAATCCTACTC TTCGG  
 7536

7432  
 3 AACCT GAGACAAAAATTGTTTCG.....CCATGGTTCACGACC CTGAT  
 AACCA GAGACAAAAATTGTTTCG.....CCATGGTTCACGACC TTGAT  
 7506

7097  
 4 AAAC TAAATATAAAAGAGAGCCGGTGTCTTTAA  
 AAAC TAAATATAAAAGAGAGCCGGTGTCTTTAA  
 7073

3886  
 5 CATCT TGGCCCCCATGCGGTAGAACACTGGTCAAACAACCCCTGACCG TTGGC  
 CATT TGGCCCCCATGCGGTAGAACACTGGTCAAACAACCCCTGACCG CTGGC  
 3933

337  
 6 AGTTA GCTAACTAGATCTGTATCTGGCGGTTCCG TTGGA  
 AGTTG GCTAACTAGATCTGTATCTGGCGGTTCCG CGGA  
 307

**B**

## XMRV Sequence Diversity

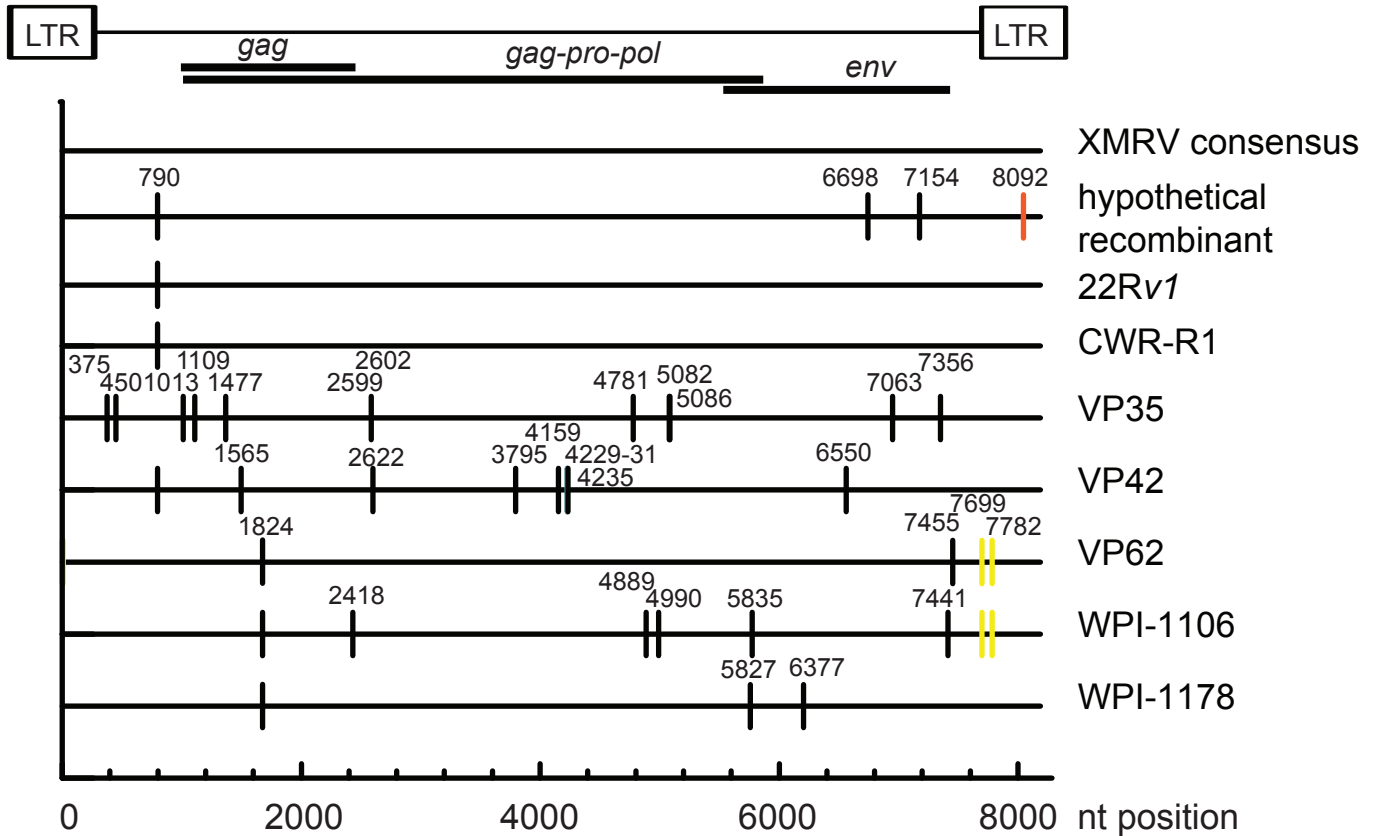

Supplement: NIHMS350457-supplement-All_Supplemental_Figures.pdf [file NIHMS350457-supplement-All_Supplemental_Figures.pdf]
